# Supplementary material for: Google Trends can improve surveillance of Type 2 diabetes
Source: Springer Nature journal article supplement (doi:10.1038/s41598-017-05091-9), 2017-07-04
Supplement: 41598_2017_5091_MOESM1_ESM.pdf [file 41598_2017_5091_MOESM1_ESM.pdf]

# Google Trends can improve surveillance of Type 2 diabetes

**Nataliya Tkachenko<sup>1,\*</sup>, Sarunkorn Chotvijit<sup>1</sup>, Neha Gupta<sup>1</sup>, Emma Bradley<sup>3</sup>, Charlotte Gilks<sup>3</sup>, Weisi Guo<sup>1</sup>, Henry Crosby<sup>1</sup>, Eliot Shore<sup>1</sup>, Malkiat Thiarai<sup>1</sup>, Rob Procter<sup>1,2</sup>, and Stephen Jarvis<sup>1,2</sup>**

<sup>1</sup>Warwick Institute for the Science of Cities, University of Warwick, Coventry, CV4 7AL, UK

<sup>2</sup>Department of Computer Science, University of Warwick, Coventry, CV4 7AL, UK

<sup>3</sup>Experian, The Sir John Peace Building, Experian Way, NG2 Business Park, Nottingham, NG80 1ZZ, UK

\*Corresponding Author: [Nataliya.Tkachenko@warwick.ac.uk](mailto:Nataliya.Tkachenko@warwick.ac.uk)

## SUPPLEMENTARY MATERIAL:

1. Database components constituting Experian Mosaic Public Sector variables (Fig 1)
2. Pearson correlation matrix between diabetes risk variables, selected from EMPS (Fig 2 and Fig 3)
3. Resulting metrics from Multilinear Regression (MLR) and Stepwise Multilinear Regression (SMR) (Table 1)
4. List of risk- and disease related keywords, used to extract weekly search volumes from the Google Trends

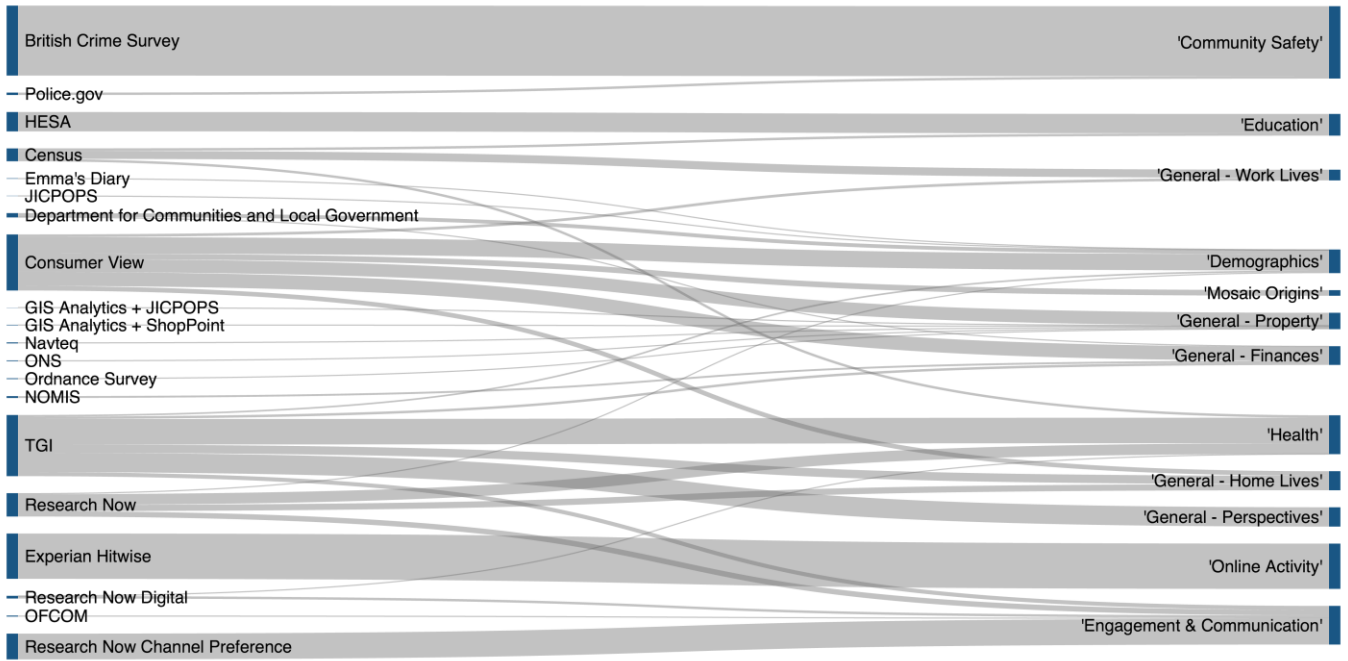

**Fig 1.** Database components constituting Experian Mosaic Public Sector variables

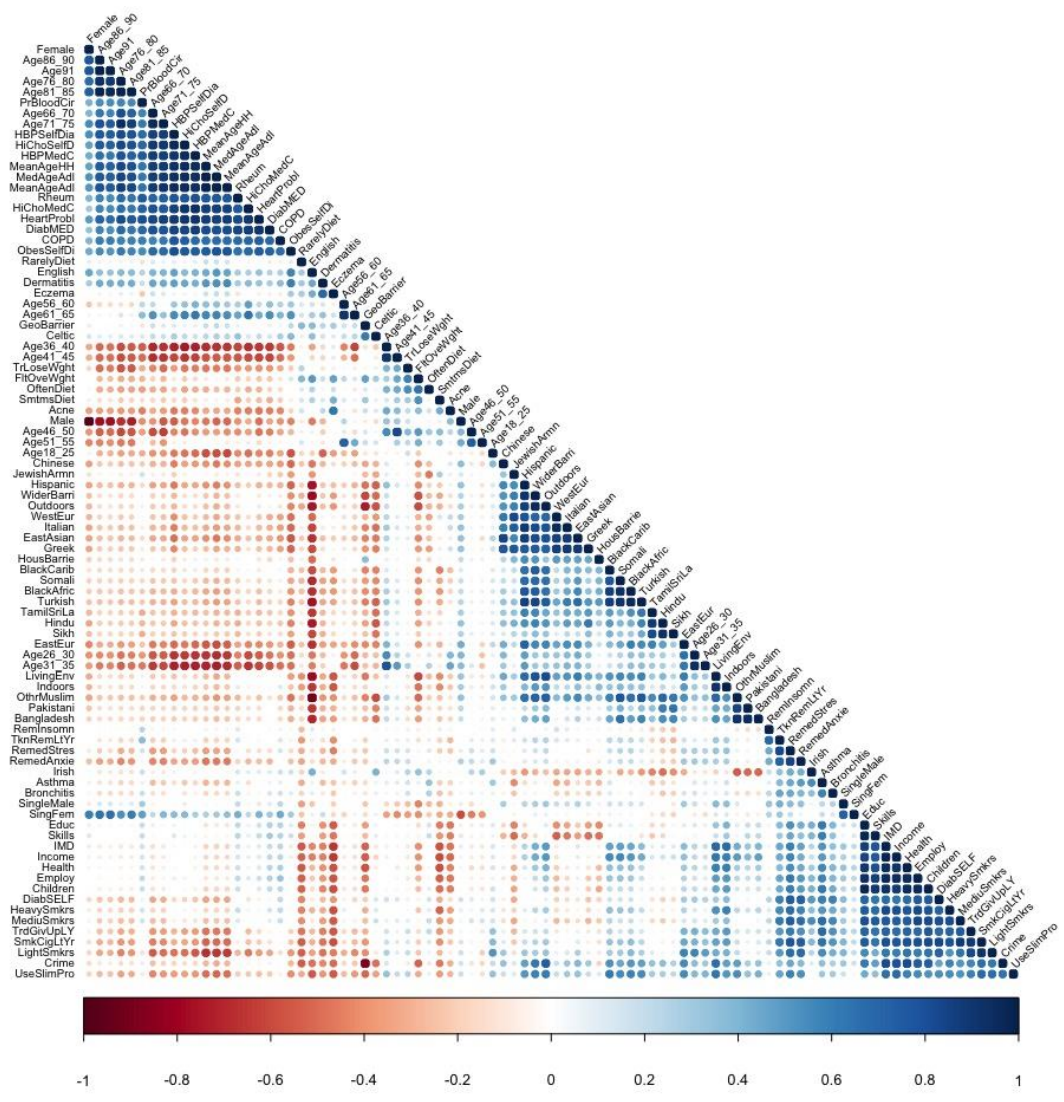

**Fig 2.** Pearson correlation matrix between diabetes risk variables, selected from EMPS. This illustration was produced in R corrgram v1.9.0

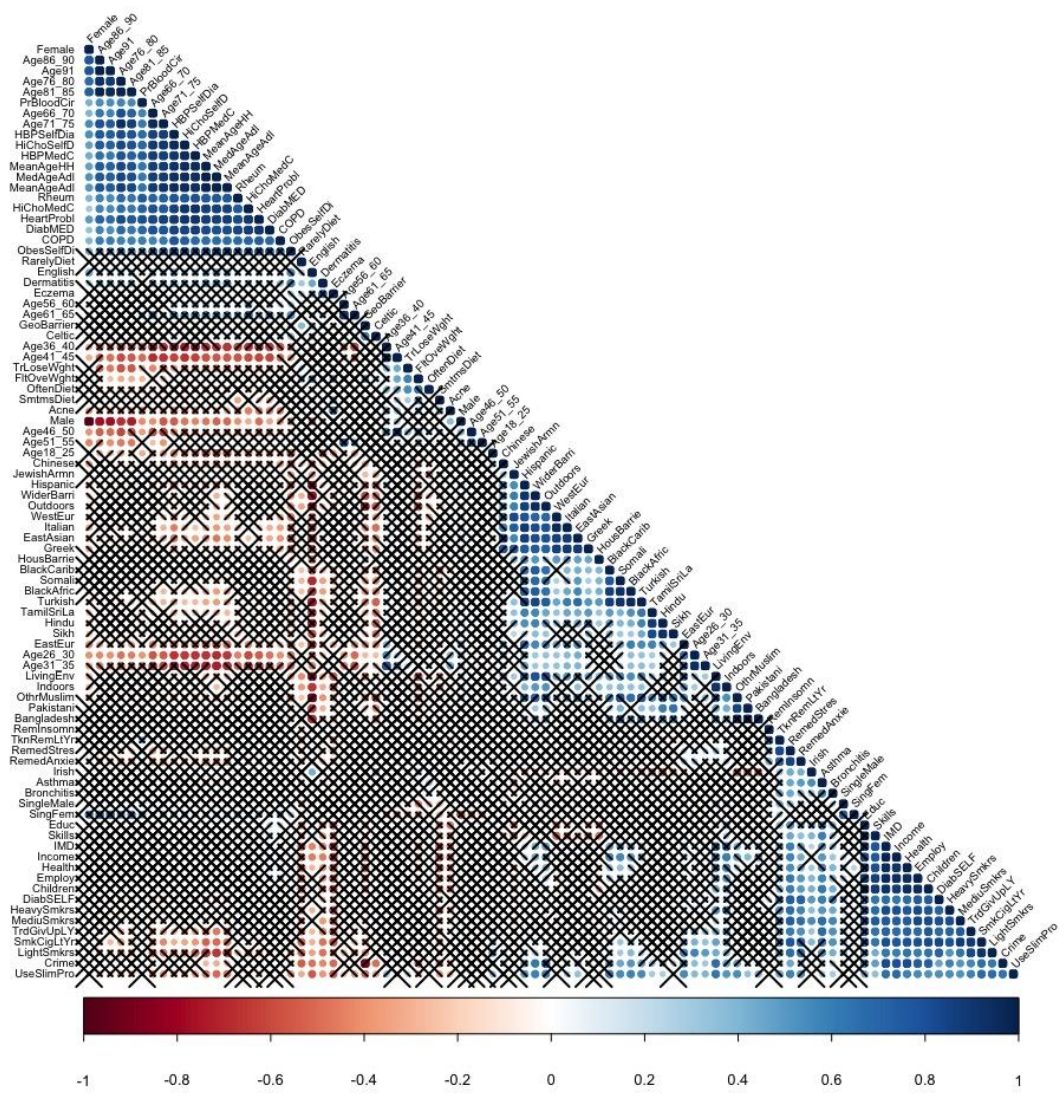

**Fig 3.** Pearson correlation matrix between diabetes risk variables, selected from EMPS: correlation significance at  $p < .05$ . This illustration was produced in R corrgram v1.9.0

|                       | Without ISB |      |       | With ISB |      |       |
|-----------------------|-------------|------|-------|----------|------|-------|
|                       | F*          | RSS  | AIC** | F*       | RSS  | AIC** |
| Multilinear           | 9.83        | 4.05 |       | 26.25    | 1.51 |       |
| Backward AIC-Stepwise | 31.65       | 2.56 | 53.15 | 45.52    | 1.09 | 16.88 |
| Forward AIC-Stepwise  | 29.16       | 2.96 | 71.17 | 41.18    | 1.15 | 26.62 |

**Table 1.** Resulting metrics from regression scenarios demonstrate that the models with self-assessed diabetes variable (With ISB) perform better than traditional diabetes model variables (Without ISB). In this case, the Backward AIC-Stepwise model outperformed both Forward AIC-Stepwise and classic multilinear models, with the metrics being consistent across both scenarios.

(\*p<.0001; \*\*Akaike Information Criterion)

|              | Without ISB                                               |                                                               | With ISB               |                                                                                    |
|--------------|-----------------------------------------------------------|---------------------------------------------------------------|------------------------|------------------------------------------------------------------------------------|
|              | Group                                                     | Keywords                                                      | Group                  | Keywords                                                                           |
| Disease      | <i>'diabetes', 'Type 2 diabetes', 'diabetes mellitus'</i> |                                                               |                        |                                                                                    |
| Risk factors | Use of Corticosteroids                                    | <i>'anxiety', 'eczema', 'acne'</i>                            | Use of Corticosteroids | <i>'anxiety', 'acne', 'insomnia'</i>                                               |
|              | Smoking                                                   | <i>'smoking', 'how to give up smoking', 'give up smoking'</i> | NA                     |                                                                                    |
|              | Deprivation                                               | <i>'deprivation', 'housing', 'cheap houses'</i>               | Deprivation            | <i>'deprivation', 'housing', 'cheap houses'</i>                                    |
|              | Ethnicity                                                 | <i>'pakistani', 'irish', 'celtic', 'black caribbean'</i>      | Ethnicity              | <i>'irish', 'somalil', 'sikh', 'celtic', 'black caribbean', 'eastern european'</i> |
|              | Treated Hypertension                                      | <i>'rheumatism'</i>                                           | Treated Hypertension   | <i>'high cholesterol'</i>                                                          |
|              | BMI                                                       | <i>'obesity'</i>                                              | BMI                    | <i>'slimming products', 'how to lose weight', 'diet'</i>                           |

**Table 2.** List of risk- and disease related keywords, used to extract weekly search volumes from the Google Trends. Data was extracted on the 7<sup>th</sup> of April 2017, for each risk group only the data from the search query with the highest propensity have been used in the analysis.
